# Supplementary material for: Metagenomic next-generation sequencing for the clinical diagnosis and prognosis of acute respiratory distress syndrome caused by severe pneumonia: a retrospective study
Source: PeerJ. 2020 Jul 29;8:e9623. doi: 10.7717/peerj.9623 (PMC7395598; doi:10.7717/peerj.9623)
Supplement: Supplemental Information 1 [file peerj-08-9623-s001.xlsx]

## Sheet: Sheet1
Sample ID	Group	Patient ID	Age (yr)	Sex	outcome (good/death)	Time in ICU (d)	Ventilator time (h)	mNGS sample type	NGS	Culture	Serological antibody test plus PCR	need to change the empirical antimicrobial therapy	SOFA score before treatment	SOFA score (3 d)	SOFA score (5 d)	SOFA score (7 d)	APACHE Ⅱscore before treatment	APACHE Ⅱscore(3 d)	APACHE Ⅱscore(5 d)	APACHE Ⅱscore(7 d)	Hypertension (yes/no)	Coronary heart disease (yes/no)	COPD (yes/no)	Bronchiectasis (yes/no)	Chronic nephrosis (yes/no)	Diabetes (yes/no)	Immunosuppression (yes/no)	Tumor (yes/no)	Smoking (yes/no)	Drinking (yes/no)	PCT（ug/L）	WBC（109/L）	Hb（g/L）	PLT（109/L）	Cr（umol/L）	T.Bil（mmol/L）	ALT（IU/L）	Alb（g/L）	APTT（sec）	NT-proBNP（pg/ml）	Lac（mmol/L）	PH	PaO2	PaCO2	Be	ARDS degree	OI	FiO2	Peep
S2	NGS	P1	54	male	good	21	331	BALF	Acinetobacter baumannii;Elizabethan	Acinetobacter baumannii	influenza A	yes	16	14	12	6	26	22	15	10	yes	no	no	no	yes	no	no	no	yes	no	47.48	16.16	79	78	492	15.9	24	27.1	59.3	2066	3.4	7.25	60	57	-3	severe	60	1	15
S3	NGS	P1	54	male	good	21	331	BALF	Acinetobacter baumannii;Elizabethan	Elizabethan	influenza A	NA
S4	NGS	P2	36	male	good	14	312	BALF	Human adenovirus7	Negative	Negative	yes	6	5	5	2	18	16	15	8	yes	no	no	no	no	no	no	no	yes	yes	9.25	5.47	131	99	201	23.5	59	27.4	34.5	656	4.5	7.41	70	32	-3.4	severe	70	1	16
S5	NGS	P3	82	male	good	28	513	BALF	aspergillus fumigatus	Aspergillus flavus;aspergillus fumigatus	influenza A	yes	8	6	6	3	24	22	16	14	no	no	no	no	no	no	no	no	no	no	0.22	3.81	120	68	70	4.6	78	27.4	37.2	647	1.2	7.34	81	42	-3.2	severe	81	1	16
S6	NGS	P4	70	male	good	10	216	BALF	Negative	coagulase-negative staphylococci;Enterobacteriaceae bacteria;Candida albicans	influenza B	no	5	6	4	3	22	20	18	13	no	no	yes	no	no	no	no	no	yes	no	0.77	13.44	111	205	69	3.8	24	31.8	21.9	460	0.9	7.45	177	38	2.3	moderate	177	1	8
S7	NGS	P5	64	male	good	13	240	BALF	streptococcus	Negative	Negative	no	7	7	6	4	21	18	15	9	no	no	yes	no	no	no	no	no	no	no	4.35	14.88	84	389	64	31	23	22.3	55.9	2623	2.2	7.42	105	34	-2.2	moderate	105	1	10
S8	NGS	P6	30	female	good	3	72	BALF	Pneumocystis jiroveci	Negative	Negative	yes	5	3	1	1	16	10	6	5	no	no	no	no	yes	no	yes	no	no	no	0.16	7	115	210	63	4.3	20	23.4	24.7	658	1.2	7.35	107	51	1.6	moderate	152	0.7	10
S9	NGS	P7	77	male	good	26	480	BALF	Stenotrophomonas maltophilia	Pseudomonas aeruginosa;Stenotrophomonas maltophilia;corynebacterium	Negative	yes	6	6	4	3	23	20	16	14	yes	no	yes	no	no	no	no	no	yes	no	9.46	13.11	146	179	103	10.1	26	32.6	33	311	0.5	7.33	126	42	-3.9	moderate	157	0.6	8
S10	NGS	P8	77	female	good	7	144	BALF	Candida albicans;aspergillus fumigatus	Negative	Negative	yes	11	10	8	4	28	22	18	13	yes	no	no	no	no	yes	no	no	no	no	0.24	18.84	75	28	55	77.4	813	29.3	54.6	1432	2.7	7.37	65	51	3.3	moderate	108	0.6	12
S11	NGS	P9	27	male	good	13	264	BALF	Acinetobacter baumannii;Human adenovirus7;Human adenovirusB1	Acinetobacter baumannii	Negative	yes	6	5	5	3	17	16	15	7	no	no	no	no	no	no	no	no	yes	yes	1.98	4.85	149	183	78	17.8	38	32.4	38	100	2.6	7.38	72	38	-2.3	severe	72	1	15
S12	NGS	P10	59	male	good	12	288	BALF	Corynebacterium striatum	Streptococcus agalactiae	Negative	yes	8	7	6	4	18	16	14	10	no	no	no	no	no	no	no	no	no	no	44.94	4.59	83	12	61	30.7	15	23.2	35.4	596.3	2.4	7.42	135	38	-0.4	mild	270	0.5	5
S13	NGS	P11	48	male	death	4	96	BALF	Klebsiella pneumoniae;Rhizopus microsporus	Stenotrophomonas maltophilia	Negative	no	8	9	NA	NA	34	32	NA	NA	no	no	no	no	no	no	yes	yes	no	no	22.34	5.58	57	25	106	19.4	11	29.8	59.9	2788	1.4	7.38	143	40	-1.2	mild	286	0.5	6
S14	NGS	P12	47	female	good	22	408	BALF	Negative	Negative	influenza A	yes	8	7	6	3	16	15	14	9	no	no	no	no	no	yes	no	no	no	no	0.44	8.59	122	79	39	12.5	38	22.8	34.6	100	1.5	7.39	104	29	-6.6	moderate	176	0.6	10
S15	NGS	P13	66	male	good	10	240	BALF	Pasteurella multocida	Pasteurella multocida;Viridans Streptococci;Neisseria	influenza A	no	6	6	5	3	17	15	15	9	no	no	no	no	no	no	no	no	yes	no	26.27	14.43	102	182	88	7.2	51	35.4	47.1	666	1.6	7.32	117	58	2.9	moderate	167	0.7	12
S16	NGS	P14	77	male	good	10	233	BALF	Prevotella melaninogenica;Acinetobacter baumannii	Viridans Streptococci;Neisseria;non-fermentative bacterial	Negative	no	7	7	8	5	21	20	18	12	yes	no	no	no	no	no	no	no	yes	no	1.79	9.37	123	86	77	18.4	66	31.4	30.6	1291	1.3	7.55	116	26	1.4	mild	232	0.5	5
S17	NGS	P15	64	male	death	7	168	BALF	Corynebacterium striatum;Pseudomonas aeruginosa;aspergillus fumigatus	corynebacterium;aspergillus fumigatus	influenza A	yes	10	9	9	NA	25	24	21	NA	yes	no	no	no	yes	no	no	no	no	no	4.99	18.91	74	344	740	4.5	17	28.5	35.9	4571	1.5	7.36	158	41	-2.1	moderate	197	0.8	8
S18	NGS	P16	54	male	good	34	711	BALF	candida tropicalis;aspergillus fumigatus	Candida tropicalis;aspergillus fumigatus	influenza A	yes	6	6	4	3	27	22	18	15	yes	no	no	no	no	yes	no	no	yes	no	0.58	23.43	73	261	199	4.8	20	23.3	30.8	1154	0.7	7.29	142	40	-6.8	mild	284	0.5	8
S19	NGS	P17	64	male	good	10	144	BALF	Haemophilus influenzae;Haemophilus egyptans	Viridans Streptococci;Neisseria	Negative	no	8	6	4	4	20	15	12	7	no	no	yes	no	no	no	no	no	yes	yes	5.84	9.02	157	74	363	11.6	3505	24	37.6	7012	3	7.27	74	89	8.3	moderate	148	0.5	8
S20	NGS	P18	53	male	good	26	470	BALF	Negative	Negative	influenza A	no	10	9	7	4	25	22	18	10	yes	no	no	no	no	no	no	no	no	no	47.29	6.19	152	173	242	13.3	28	36.2	35.7	100	4.6	7.24	31	31	-12.7	severe	31	1	16
S21	NGS	P19	55	female	good	12	264	BALF	Negative	Viridans Streptococci	Negative	no	8	6	4	2	18	18	13	6	no	no	no	no	no	no	no	no	no	no	5.24	10.65	105	159	53	4.8	85	25.8	26.9	100	1.2	7.41	98	46	3.8	severe	98	1	15
S22	NGS	P20	44	male	good	30	648	BALF	Klebsiella pneumoniae;Metamorphosis klebsiella;Corynebacterium striatum;Veillonella parvula	Klebsiella pneumoniae	influenza A	yes	6	5	3	2	22	19	15	8	no	no	no	yes	no	no	no	yes	no	no	0.58	8.64	91	203	74	8.7	87	43.2	59	345	0.8	7.43	70	45	5.1	severe	70	1	16
S23	NGS	P21	64	male	good	30	709	BALF	enterococcus;streptococcus;corynebacterium;Porphyrin monomonas;Capnocytophaga;enterococcus;streptococcus;Streptococcus pneumoniae;抗性corynebacterium;Veillonella parvula ;Porphyrin monomonas;Capnocytophaga sputigena ;Candida albicans;candida tropicalis	Candida tropicalis;Viridans Streptococci	Negative	yes	7	6	5	5	22	18	14	12	no	no	yes	no	no	no	no	yes	yes	no	1.33	11.71	118	137	110	7.8	14	31.6	31.5	526	1.4	7.3	87	58	0.8	moderate	145	0.6	6
S24	NGS	P22	26	female	good	6	120	BALF	Mycoplasma pneumoniae	Negative	Mycoplasma pneumoniae	yes	5	4	2	0	16	15	7	2	no	no	no	no	no	no	no	no	no	no	0.78	9.61	107	250	62	4.3	16	23.5	38	593	1.9	7.24	74	62	-1.4	moderate	148	0.5	10
S25	NGS	P23	79	male	death	8	188	BALF	Corynebacterium striatum;Candida albicans;Human herpes virus	Candida albicans	Negative	yes	10	10	12	14	28	28	26	22	no	yes	no	no	no	no	no	no	no	no	1.09	15.56	51	74	256	17.2	7	35.9	32.9	4685	1.7	7.53	125	23	-3.2	mild	250	0.5	5
S26	NGS	P24	70	male	good	12	255	BALF	Streptococcus mitis;Staphylococcus epidermidis;Veillonella parvula ;Candida albicans;Human herpes virus	Candida albicans	Negative	yes	5	6	4	3	25	21	18	13	yes	no	yes	no	no	no	no	yes	yes	no	0.34	17.66	137	360	71	12	28	25.1	42.9	468	2.8	7.31	159	59	1.9	moderate	198	0.8	10
S27	NGS	P25	55	male	good	15	192	BALF	Aspergillus oryzae	Negative	influenza A	yes	5	5	4	2	17	15	11	8	no	no	yes	no	no	no	no	no	yes	no	0.1	4.74	132	158	71	6.7	77	26.6	20.9	432	3.8	7.39	124	43	0.7	mild	206	0.6	10
S28	NGS	P26	59	female	death	10	230	BALF	Veillonella parvula Candida albicans;Pneumocystis jiroveci	Negative	Negative	yes	9	8	7	9	26	24	18	25	no	no	no	no	no	no	yes	no	no	no	0.16	21.93	141	236	90	8.2	23	38.2	35	469	3.1	7.41	75	47	9.5	severe	75	1	16
S29	NGS	P27	19	female	good	7	110	BALF	Staphylococcus epidermidis	Negative	Negative	yes	5	4	2	1	22	20	15	8	no	no	no	no	no	no	yes	no	no	no	0.82	9.84	71	112	265	3.6	20	18.8	25.3	2869	1.4	7.41	66	31	-5	severe	66	1	15
S30	NGS	P28	72	male	death	6	144	BALF	Veillonella parvula ;Veillonella dispar;enterococcus;Staphylococcus epidermidis;Acinetobacter baumannii;Pneumocystis jiroveci;Candida albicans	Negative	Negative	yes	9	8	8	NA	28	27	25	NA	yes	no	no	no	no	yes	no	no	yes	no	0.71	14.35	118	107	121	48.1	10	30.6	33.3	1604	3	7.35	64	41	-2.9	severe	80	0.8	16
S31	NGS	P29	48	male	death	20	544	BALF	Acinetobacter baumannii;Human herpes virus4	Enterobacteriaceae bacteria	Negative	yes	5	5	4	6	19	18	16	15	no	no	no	no	no	no	no	yes	yes	no	1.3	21.6	103	88	64	17.1	42.3	25.8	35.2	3559	2.2	7.33	62	56	2.3	severe	62	1	15
S32	NGS	P30	67	male	good	28	456	BALF	Streptococcus parasanguis ;streptococcus;Candida albicans;candida glabrata;Human adenovirus55	Candida albicans	Negative	yes	8	7	6	4	26	24	18	15	yes	no	yes	no	no	yes	no	no	yes	no	4.2	20.53	105	143	246	39.9	38.5	36.3	79.8	100	1.6	7.41	60	48	4.8	severe	62	1	15
S33	NGS	P31	55	female	death	9	212	BALF	Haemophilus influenzae;Pneumocystis jiroveci;Human herpes virus5CMV	Negative	Negative	yes	7	6	7	8	23	22	20	19	no	no	no	no	no	no	yes	no	no	no	0.163	12.56	134	168	73	5	12.7	23.3	20.2	128	7	7.44	60	41	3.3	severe	60	1	15
S34	NGS	P32	39	male	good	26	528	BALF	Human adenovirus7	Negative	Negative	yes	8	8	6	6	23	20	14	11	no	no	no	no	yes	no	no	no	yes	yes	22.4	4.49	127	206	920	9.1	38.3	26.4	44.8	100	1.6	7.3	80	38	-7	severe	80	1	15
S35	NGS	P32	39	male	good	11	240	BALF	Chryseobacterium indologenes;aspergillus fumigatus	Acinetobacter baumannii;Yeastlike fungus	Negative	NA																			2.77	12.98	93	358	228	21.1	24.3	42.8	46	100	0.9	7.44	86	40	2.8	severe	86	1	15
S36	NGS	P33	25	male	good	11	240	BALF	Human adenovirus 55	Negative	Negative	no	4	4	2	0	12	12	8	2	no	no	no	no	no	no	no	no	yes	no	1.89	8.09	144	176	75	4.8	48.9	29.5	38.9	100	1.3	7.42	69	36	-0.7	severe	69	1	15
S37	NGS	P34	71	male	death	5	120	BALF	Legionella pneumophila;Stenotrophomonas maltophilia;Pseudomonas aeruginosa;aspergillus fumigatus	Stenotrophomonas maltophilia;aspergillus fumigatus	influenza B	yes	9	8	12	NA	26	23	23		no	no	yes	no	no	no	no	no	yes	no	12.41	12.45	118	101	72	1.8	36.4	20.1	40.3	8200	1.6	7.3	83	73	7.2	moderate	102	0.8	10
S38	NGS	P35	67	male	good	7	110	BALF	Neisseria sicca	Viridans Streptococci;corynebacterium	Negative	no	8	8	7	2	26	22	20	18	yes	yes	yes	no	yes	no	no	no	yes	no	30.63	17.02	124	83	1033	12	5.4	31.2	44.3	5367	1.4	7.33	122	36	-6.3	moderate	152	0.8	10
S39	NGS	P36	60	female	good	7	115	BALF	Veillonella parvula ;Staphylococcus epidermidis;Pneumocystis jiroveci; EBV	Viridans Streptococci;Yeastlike fungus	Negative	yes	5	4	1	1	15	13	7	6	no	no	no	no	no	no	no	yes	no	no	0.302	8.4	104	195	47	12.8	25.3	23.1	27.9	100	1.6	7.48	90	34	1.9	moderate	112	0.8	10
S40	NGS	P37	72	male	good	9	144	BALF	Hemolytic staphylococcus;Human herpes virus1 HSV1	Negative	Negative	yes	5	4	2	1	20	17	15	8	no	yes	no	no	no	no	no	no	yes	no	0.95	11.81	132	172	116	11.9	23.7	33.5	23.2	100	4.6	7.3	97	43	-5.1	moderate	138	0.7	12
S41	NGS	P38	62	male	good	20	360	BALF	Klebsiella pneumoniae	Klebsiella pneumoniae	Negative	no	6	5	4	4	31	26	22	21	yes	no	no	no	yes	no	no	no	no	no	100	10.3	100	57	1492	15.6	80.9	28.5	48.2	34207	7.5	7.22	103	34	-12.8	moderate	103	1	8
S42	NGS	P39	27	female	good	5	120	BALF	Staphylococcus aureus;Staphylococcus epidermidis;Haemophilus influenzae;Klebsiella pneumoniae;Mycoplasma pneumoniae	Staphylococcus epidermidis;Yeastlike fungus	Negative	no	6	3	1	1	21	12	8	3	no	no	no	no	no	no	yes	yes	no	no	5.5	1.04	88	157	37	53.7	29.6	17.3	46	12421	1.6	7.38	150	29	-7.5	mild	214	0.7	8
S43	NGS	P40	77	male	good	13	240	BALF	Cryptococcus neoformans;Pneumocystis jiroveci	Negative	Negative	yes	7	5	4	4	24	18	15	11	no	no	no	no	yes	no	yes	yes	no	no	0.02	4.93	54	45	167	5.6	36.8	26	59.3	9560	2.2	7.41	109	34	-2.7	moderate	136	0.8	10
S44	NGS	P41	74	male	death	12	288	BALF	Klebsiella pneumoniae;Pseudomonas aeruginosa;Hemolytic staphylococcus;candida tropicalis	corynebacterium;Candida tropicalis	Negative	yes	7	6	5	7	25	23	16	21	no	no	no	no	no	no	no	yes	no	no	0.5	4.05	57	222	55	7.6	17.8	30.7	33.5	211	0.9	7.43	67	50	8.1	moderate	111	0.6	8
S45	NGS	P42	40	female	good	8	168	BALF	Neisseria aureus;Neisseria subflava;Haemophilus influenzae;Pneumocystis jiroveci	Viridans Streptococci;Neisseria	Negative	yes	5	4	4	3	18	14	12	7	no	no	no	no	no	no	yes	yes	no	no	0.44	19.82	91	323	62	12	33.7	30	29.5	840	2.9	7.53	134	39	9.1	mild	223	0.6	8
S46	NGS	P42	40	female	good	8	168	BALF	Pneumocystis jiroveci	Negative	Negative	NA
S47	noNGS	P43	45	male	death	25	600	NA	NA	Stenotrophomonas maltophilia	Negative	yes	8	9	7	9	34	28	27	25	no	no	no	no	no	no	yes	yes	no	no	24.34	2.58	66	25	106	19.4	11	29.8	59.9	2788	1.4	7.38	79	40	-1.2	severe	79	1	12
S48	noNGS	P44	65	male	good	8	134	NA	NA	Viridans Streptococci	Negative	no	8	6	3	2	24	15	10	8	no	no	no	yes	no	no	no	yes	yes	no	2.5	13.73	99	337	91	5.2	58	26.4	34	228	0.9	7.4	59	33.4	-1.8	moderate	118	0.5	8
S49	noNGS	P45	82	female	death	22	528	NA	NA	Acinetobacter baumannii	influenza A、influenza B	yes	11	10	8	8	22	20	18	17	yes	yes	no	no	no	no	no	yes	yes	no	2.44	7	115	210	63	4.3	20	23.4	24.7	658	1.2	7.35	107	51	1.6	moderate	152	0.7	10
S50	noNGS	P46	73	male	death	5	120	NA	NA	aspergillus fumigatus	influenza A、influenza B	yes	8	11	NA	NA	20	24	NA	NA	no	no	yes	no	no	no	no	no	no	yes	3.5	18.91	74	344	740	4.5	17	28.5	35.9	4571	1.5	7.36	158	41	-2.1	moderate	197	0.8	8
S51	noNGS	P47	79	male	good	13	245	NA	NA	Staphylococcus aureus;Candida albicans	influenza A	yes	6	6	5	3	18	16	15	13	yes	no	yes	no	yes	yes	no	no	no	no	0.3	8.93	129	149	121	7.8	11	24.7	28.4	3136	1.2	7.13	100	98	-0.1	moderate	125	0.8	8
S52	noNGS	P48	51	male	death	13	312	NA	NA	Pseudomonas aeruginosa;Acinetobacter baumannii	Negative	yes	11	12	12	14	14	16	15	19	yes	no	no	no	no	no	no	no	yes	no	9.46	13.11	146	179	103	10.1	26	32.6	33	311	0.5	7.33	126	42	-3.9	moderate	157	0.6	8
S53	noNGS	P49	70	male	good	12	240	NA	NA	Viridans Streptococci	Negative	no	7	6	6	5	21	19	14	13	yes	no	yes	no	no	no	no	no	no	no	0.55	11.81	132	172	116	11.9	23.7	33.5	23.2	275	4.6	7.3	97	43	-5.1	moderate	138	0.7	12
S54	noNGS	P50	21	male	good	6	110	NA	NA	Pseudomonas aeruginosa	Negative	no	6	4	3	0	18	14	8	3	no	no	no	no	no	no	no	no	no	no	1.33	13.5	85	241	78	6	22	23.2	35	100	2.5	7.33	103	49	-0.7	mild	206	0.5	8
S55	noNGS	P51	62	female	death	5	120	NA	NA	Escherichia coli;Viridans Streptococci	Negative	no	10	14	NA	NA	28	33	NA	NA	yes	yes	no	no	yes	no	no	no	yes	no	6.27	14.43	102	182	88	7.2	51	35.4	47.1	666	1.6	7.32	117	58	2.9	moderate	167	0.7	12
S56	noNGS	P52	71	male	death	14	300	NA	NA	Escherichia coli	Negative	no	4	5	7	6	19	17	18	15	no	yes	yes	yes	no	no	no	no	yes	no	0.41	13.39	84	81	42	25.6	24	32	59.3	2066	0.9	7.54	86	44	4.7	moderate	172	0.5	8
S57	noNGS	P53	54	male	good	16	305	NA	NA	Staphylococcus aureus	influenza A	no	6	6	5	3	26	22	18	12	no	no	no	no	no	yes	no	no	no	no	0.8	19	143	231	112	17	59	29	34.5	656	2.8	7.32	55	57	1.8	severe	55	1	15
S58	noNGS	P54	71	female	good	15	123	NA	NA	Pseudomonas aeruginosa;Klebsiella pneumoniae	Negative	no	3	4	3	2	18	15	14	12	yes	no	yes	yes	no	no	no	no	no	no	0.2	11.6	76	206	59	4	78	33	37.2	647	0.6	7.43	123	61	14.2	mild	246	0.5	6
S59	noNGS	P55	69	female	good	4	50	NA	NA	Viridans Streptococci;Neisseria	Negative	no	2	2	0	0	22	12	10	8	no	no	yes	no	no	no	no	no	no	no	0.12	7.48	167	128	67	19.5	28	28	26.4	480	1	7.55	56	55	21	severe	80	0.7	12
S60	noNGS	P56	24	male	good	6	92	NA	NA	Negative	Negative	no	2	2	0	0	12	11	4	0	no	no	no	no	no	no	no	no	no	no	0.4	3.68	149	112	98	7.9	24	27	21.9	460	1.7	7.31	128	48	-3.3	moderate	182	0.7	12
S61	noNGS	P57	65	male	good	12	240	NA	NA	Klebsiella pneumoniae;Candida albicans	Negative	yes	4	4	3	2	22	19	12	9	no	no	no	no	no	no	no	yes	no	no	100	3.94	104	198	143	8.2	2	33.2	22	255	3	7.19	51	68	-3.8	severe	72	0.7	12
S62	noNGS	P58	61	male	good	8	144	NA	NA	Acinetobacter baumannii;Pseudomonas aeruginosa	Negative	yes	7	6	6	3	25	24	17	11	yes	no	yes	no	no	yes	no	no	yes	no	100	13.11	90	194	123	2.5	136	14.6	45.5	1518	2.2	7.38	116	28	-7.6	moderate	193	0.6	6
S63	noNGS	P59	42	female	death	21	504	NA	NA	Negative	Negative	no	7	6	7	5	17	18	16	14	no	no	no	no	no	no	yes	no	no	no	0.079	12.35	103	154	58	14.5	28	27.1	26.4	480	0.7	7.44	85	44	5.1	moderate	102	0.8	12
S64	noNGS	P60	29	male	death	26	612	NA	NA	Negative	Negative	no	10	8	9	7	33	30	25	24	no	no	no	no	yes	no	yes	no	no	no	2.81	11.09	95	41	719	4	6	26.4	110.8	100	2.5	7.33	112	49	-0.7	moderate	112	1	12
S65	noNGS	P61	80	male	good	10	182	NA	NA	Viridans Streptococci;Acid bacillus	Negative	no	3	4	3	2	14	15	11	9	yes	yes	no	no	no	no	no	no	no	no	0.24	18.84	75	128	55	77.4	813	29.3	54.6	1432	2.7	7.37	65	51	3.3	moderate	108	0.6	12
S66	noNGS	P62	72	male	death	6	144	NA	NA	Haemophilus influenzae	Negative	no	5	6	9	NA	20	23	26	NA	yes	no	yes	no	no	yes	no	no	no	no	21.98	4.85	149	183	78	17.8	38	32.4	38	100	2.6	7.38	72	38	-2.3	severe	72	1	15
S67	noNGS	P63	68	male	death	9	216	NA	NA	Acinetobacter baumannii;Candida albicans	Negative	yes	9	8	7	9	19	18	20	22	yes	no	yes	yes	no	no	no	no	yes	no	40.94	14.59	83	12	61	30.7	15	23.2	35.4	596.3	2.4	7.42	135	38	-0.4	mild	270	0.5	5
S68	noNGS	P64	64	male	good	40	816	NA	NA	Staphylococcus aureus;Viridans Streptococci;Neisseria;Yeastlike fungus	Negative	yes	10	10	9	9	26	24	22	22	no	no	no	no	no	yes	yes	no	no	no	0.414	6.74	105	174	113	26.8	87	24.8	34.7	787	1.2	7.4	65	31	-4.8	severe	65	1	12
S69	noNGS	P65	35	male	good	11	216	NA	NA	Acinetobacter baumannii;Aspergillus flavus	Negative	yes	3	4	3	2	11	13	8	6	no	no	no	no	no	no	no	no	no	no	0.1	5.15	119	143	60.5	11.8	23	25.8	55.9	2623	1.3	7.41	85	40	0.7	moderate	170	0.5	8
S70	noNGS	P66	87	male	death	17	408	NA	NA	Escherichia coli	Negative	no	9	9	11	9	28	28	25	22	no	no	yes	no	no	yes	no	no	yes	no	3.6	15.27	57	87	206	55.4	20	22.8	24.7	658	4.5	7.45	105	34	0.5	mild	210	0.5	6
S71	noNGS	P67	74	male	death	5	120	NA	NA	Acinetobacter baumannii	Negative	yes	4	5	8	NA	21	24	28	NA	yes	no	yes	yes	no	no	no	no	yes	no	0.05	15.26	135	206	96.8	9.5	26	30.4	33	311	1.7	7.31	87	79	10.6	moderate	174	0.5	8
S72	noNGS	P68	21	female	good	15	183	NA	NA	Negative	Negative	no	13	11	8	4	25	20	13	12	no	no	no	no	no	no	yes	no	no	no	42.5	33.94	133	118	231	39.1	45	18.6	54.6	1432	7.6	7.32	78	32	-8.5	moderate	156	0.5	6
S73	noNGS	P69	60	male	death	15	360	NA	NA	Escherichia coli;Staphylococcus aureus	Negative	no	3	3	3	5	18	16	15	18	no	no	no	no	no	no	no	no	yes	yes	10.61	15.31	132	285	118	22.3	38	41.5	38	100	0.9	7.28	136	51	-3.2	mild	272	0.5	5
S74	noNGS	P70	64	male	good	15	311	NA	NA	Achromobacter xylosoxidans	Negative	no	4	3	4	2	17	14	10	9	no	no	yes	no	no	no	no	no	yes	no	0.06	13.31	119	221	53.5	5.2	49	36.9	20.7	4491	2.4	7.3	95	99	14	moderate	158	0.6	6
S75	noNGS	P71	64	male	death	2	40	NA	NA	Acinetobacter baumannii;Yeastlike fungus	Negative	yes	7	NA	NA	NA	26	NA	NA	NA	no	yes	no	no	no	no	no	no	yes	yes	22.34	5.58	57	25	106	19.4	11	29.8	59.9	2788	1.4	7.38	143	40	-1.2	moderate	143	1	12
S76	noNGS	P72	69	male	good	5	88	NA	NA	Viridans Streptococci;Neisseria	Negative	no	4	3	0	0	14	13	11	9	no	no	yes	no	no	no	no	no	yes	no	0.16	12.72	129	185	73	16.9	11	31.7	29.3	562	2.3	7.34	116	69	8.2	mild	290	0.4	5
S77	noNGS	P73	73	female	death	5	110	NA	NA	Acinetobacter baumannii;Viridans Streptococci	Negative	yes	9	9	NA	NA	28	27	NA	NA	no	no	yes	yes	yes	no	no	no	no	no	0.44	8.59	122	79	344	12.5	38	22.8	34.6	100	1.5	7.39	104	29	-6.6	moderate	176	0.6	10
S78	noNGS	P74	35	male	good	6	115	NA	NA	Enterobacter cloacae	Negative	no	4	4	1	0	18	14	7	5	no	no	no	no	yes	no	yes	no	no	no	0.22	11.33	110	156	73	16.9	11	31.7	29.3	562	1.8	7.44	116	34	8.2	mild	232	0.5	5
S79	noNGS	P75	65	female	good	14	323	NA	NA	Candida albicans	Negative	yes	5	4	2	1	28	24	18	13	yes	no	yes	no	no	no	no	no	no	no	0.25	10.09	102	153	61	23.2	18	29.4	23.2	538	0.7	7.52	132	35	5.6	mild	264	0.5	5
S80	noNGS	P76	65	female	good	12	277	NA	NA	Candida albicans	Negative	yes	3	3	2	1	16	14	12	10	no	no	no	no	yes	no	yes	no	no	no	4.66	18	72	91	329	5	5	24.5	41.5	7982	4	7.37	119	32	-6.2	mild	238	0.5	8
S81	noNGS	P77	63	male	good	13	245	NA	NA	Viridans Streptococci;Neisseria	Negative	no	8	8	6	3	24	22	18	14	yes	no	no	no	no	no	no	no	yes	yes	100	27.23	112	4	450	21.1	21	27.4	48.1	15067	4.4	7.26	95	40	-8.6	moderate	158	0.6	8
S82	noNGS	P78	76	male	good	7	130	NA	NA	Escherichia coli	Negative	no	3	4	3	1	14	15	12	9	no	no	yes	no	no	yes	no	no	yes	no	0.51	15.95	104	183	48	7.3	16	28.9	34.9	837	1.3	7.53	97	43	11.9	moderate	194	0.5	6
S83	noNGS	P79	68	male	death	11	215	NA	NA	Negative	Negative	no	5	5	7	7	22	20	18	17	no	no	yes	no	no	no	no	no	no	no	2.77	16.6	93	153	356	6.4	28	26	21.9	2066	1.4	7.28	86	55	-0.7	moderate	143	0.6	8
S84	noNGS	P80	81	male	good	15	311	NA	NA	Candida albicans	Negative	yes	8	7	5	3	26	22	18	15	no	no	no	no	no	no	no	no	no	no	4.35	14.88	84	233	64	31	23	22.3	55.9	2623	2.2	7.42	105	34	-2.2	moderate	131	0.8	10
S85	noNGS	P81	42	female	death	10	230	NA	NA	Stenotrophomonas maltophilia	Negative	no	6	6	6	8	22	21	20	22	no	no	no	no	no	no	no	yes	no	no	1.54	10.91	69	182	99	24	67	33.1	25	798	0.9	7.44	112	51	9.4	moderate	140	0.8	10
S86	noNGS	P82	46	male	death	10	233	NA	NA	Acinetobacter baumannii;aspergillus fumigatus	influenza A	yes	11	10	8	12	20	18	16	20	no	no	no	no	no	yes	no	no	yes	no	0.07	15.85	140	129	96	17.5	81	38.3	84	193	1.6	7.21	56	88	3.6	severe	56	1	16
S87	noNGS	P83	45	male	good	10	144	NA	NA	Candida albicans	influenza A	yes	4	4	3	1	14	10	8	6	yes	no	no	no	no	no	no	yes	no	no	4.11	14.33	125	171	117	14.4	23	33.9	59.3	100	1.9	7.39	155	42	0.2	mild	258	0.6	5
S88	noNGS	P84	72	male	death	14	288	NA	NA	Escherichia coli	Negative	no	8	6	4	4	31	27	22	15	no	no	no	no	no	no	no	no	no	yes	73.08	0.42	138	197	49	10.8	25	36.4	32	9376	0.8	7.16	70	84	-1.7	severe	70	1	10
S89	noNGS	P85	66	female	death	8	192	NA	NA	Acinetobacter baumannii	Negative	yes	9	8	7	9	26	24	21	25	yes	no	no	no	no	no	yes	yes	yes	no	1.153	15.48	70	24	70	12.4	27	28.2	34.5	100	1.6	7.49	74	52	14.1	moderate	148	0.5	10
S90	noNGS	P86	69	female	good	10	230	NA	NA	candida glabrata	Negative	yes	8	6	4	3	26	24	16	15	yes	no	no	no	no	yes	yes	no	no	no	81.6	21.67	127	193	180	11.4	33	38.5	37.2	647	2.2	7.38	76	35	-3.5	severe	95	0.8	14
S91	noNGS	P87	57	male	death	10	240	NA	NA	candida glabrata	Negative	yes	5	4	6	6	20	22	15	22	yes	no	no	no	no	no	no	yes	no	no	30.44	38.09	122	286	69	12	34	26.6	26.4	5342	3.2	7.35	93	45	-1.1	moderate	155	0.6	10
S92	noNGS	P88	62	male	death	8	208	NA	NA	Negative	Negative	no	8	7	6	8	21	20	18	23	no	no	no	no	no	no	no	no	no	no	2.81	24.52	108	53	88.5	236.4	456	32.9	34.5	3506	2.3	7.52	125	38	7.5	mild	208	0.6	8
S93	noNGS	P89	69	male	death	13	312	NA	NA	Staphylococcus aureus;Stenotrophomonas maltophilia;candida glabrata;Viridans Streptococci	influenza A	no	9	10	7	8	24	26	21	25	no	no	no	no	no	no	no	no	no	no	2.65	17.6	73	198	371	6.4	28	25.7	21.9	2066	1.4	7.28	86	55	-0.7	moderate	143	0.6	6
S94	noNGS	P90	71	female	death	3	70	NA	NA	Candida tropicalis	Negative	no	9	12	NA	NA	27	32	NA	NA	no	no	no	no	no	no	yes	no	no	no	2.23	6.38	99	94	65	20.4	147	21.7	41.2	536	2.1	7.44	50	35	-0.1	severe	50	1	16
S95	noNGS	P91	38	male	good	14	189	NA	NA	Klebsiella pneumoniae	Negative	no	4	3	1	1	14	12	6	5	no	no	no	no	no	no	no	yes	no	no	4.33	12.33	125	121	107	14.4	23	33.9	59.3	100	1.9	7.39	155	42	0.2	mild	258	0.6	5
S96	noNGS	P92	33	male	good	11	216	NA	NA	Acinetobacter baumannii	Negative	yes	3	3	2	1	11	12	7	4	no	no	no	no	no	no	no	no	no	no	0.1	4.5	109	133	55	11.8	34	27	34	455	1.3	7.41	95	40	0.7	moderate	190	0.5	8
S97	noNGS	P93	23	female	good	15	183	NA	NA	Negative	influenza A	no	5	5	3	2	16	14	10	6	no	no	no	no	no	no	yes	no	no	no	25	4.55	133	118	203	39.1	45	18.6	54.6	1432	3.6	7.32	78	32	-8.5	moderate	156	0.5	6
S98	noNGS	P94	42	female	death	14	336	NA	NA	Acinetobacter baumannii;aspergillus	Negative	yes	7	7	6	8	21	20	18	22	no	no	no	no	no	no	yes	yes	no	no	0.079	12.35	103	154	58	14.5	28	27.1	26.4	480	0.7	7.44	85	44	5.1	moderate	102	0.8	12
S99	noNGS	P95	45	male	death	18	432	NA	NA	Stenotrophomonas maltophilia	Negative	no	8	7	7	9	34	26	22	22	no	no	no	no	no	no	yes	yes	no	no	24.34	2.58	67	24	105	44	55	20	59.9	2788	7.4	7.38	79	40	-1.2	severe	79	1	12
[truncated: 7 more columns]
